# Supplementary material
Source: MDPI journal article supplement (https://www.mdpi.com/2076-3417/12/24/12582)
Supplement: s1 [file s1 › applsci-2063418-supplementary.pdf]

# Supporting information

## Evaluation of surface-active agent hexadecyltrimethylammonium bromide with vertical self-alignment property to align liquid crystals for various cell gap conditions

**Jun-Seok Ma <sup>1</sup>, Jin-Young Choi <sup>1</sup>, Hyun-Ji Shin <sup>1</sup>, Jae-Hwan Lee <sup>2</sup>, Seung-Won Oh <sup>2,\*</sup>, and Wook-Sung Kim <sup>1,\*</sup>**

*<sup>1</sup>Department of Electrical Electronics Engineering, Laboratory of Wave-Arrays and Display Engineering (WADE group), POSTECH, Pohang, Gyeongbuk, Republic of Korea*

*<sup>2</sup>Department of Electrical Information Communication Engineering, Laboratory of Liquid Crystal Photonics (LCP group), Kangwon National University, Samcheok, Republic of Korea*

E-mail: wsungkim@postech.ac.kr, ohseungwon@kangwon.ac.kr

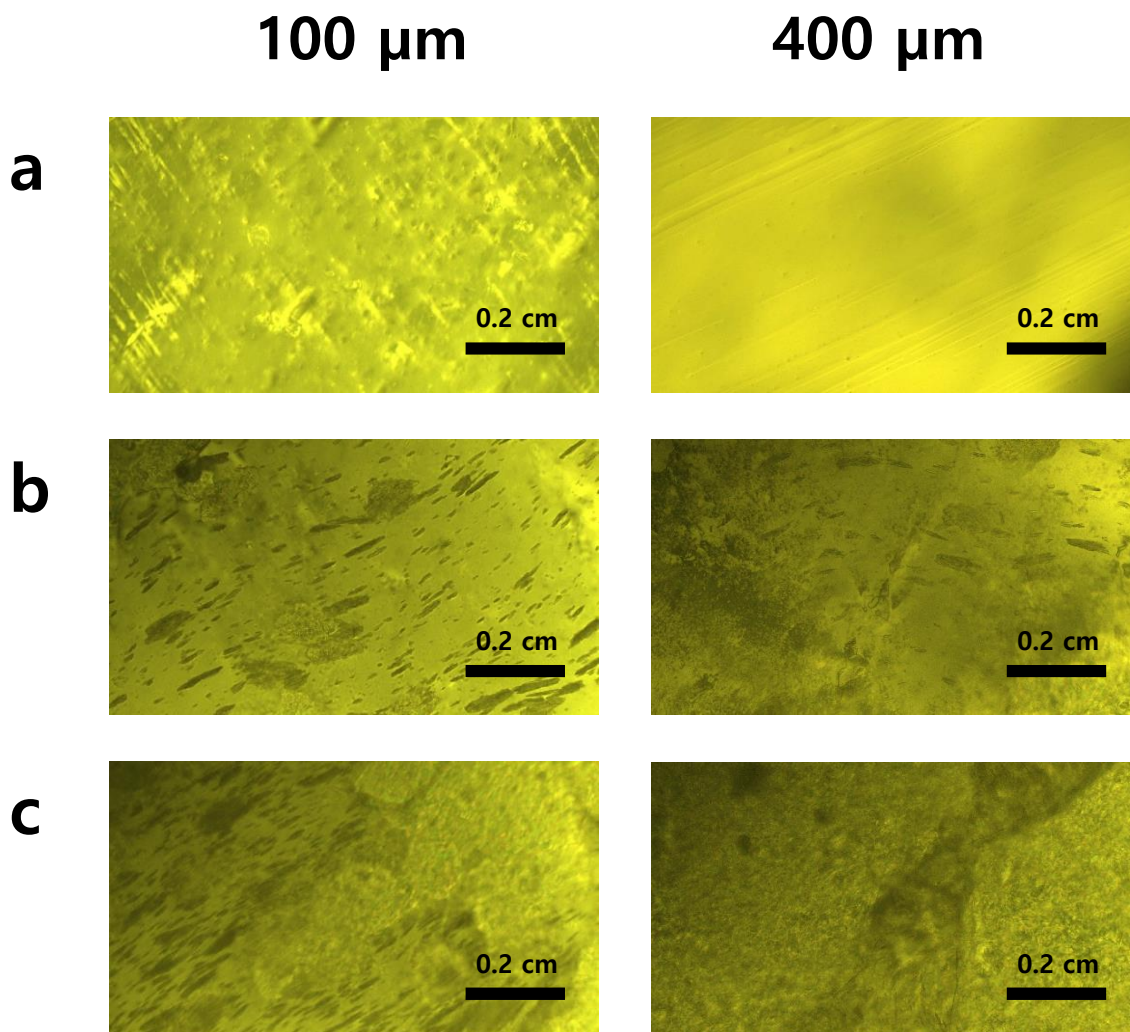

**Fig. S1.** The POM images about the no-alignment state caused by a thick cell gap. The left side depicts 100  $\mu\text{m}$  cells, and the right side shows 400  $\mu\text{m}$  cells. And each line represents concentration of (a) 1 wt% HTAB, (b) 5 wt% HTAB, and (c) 10 wt% HTAB.

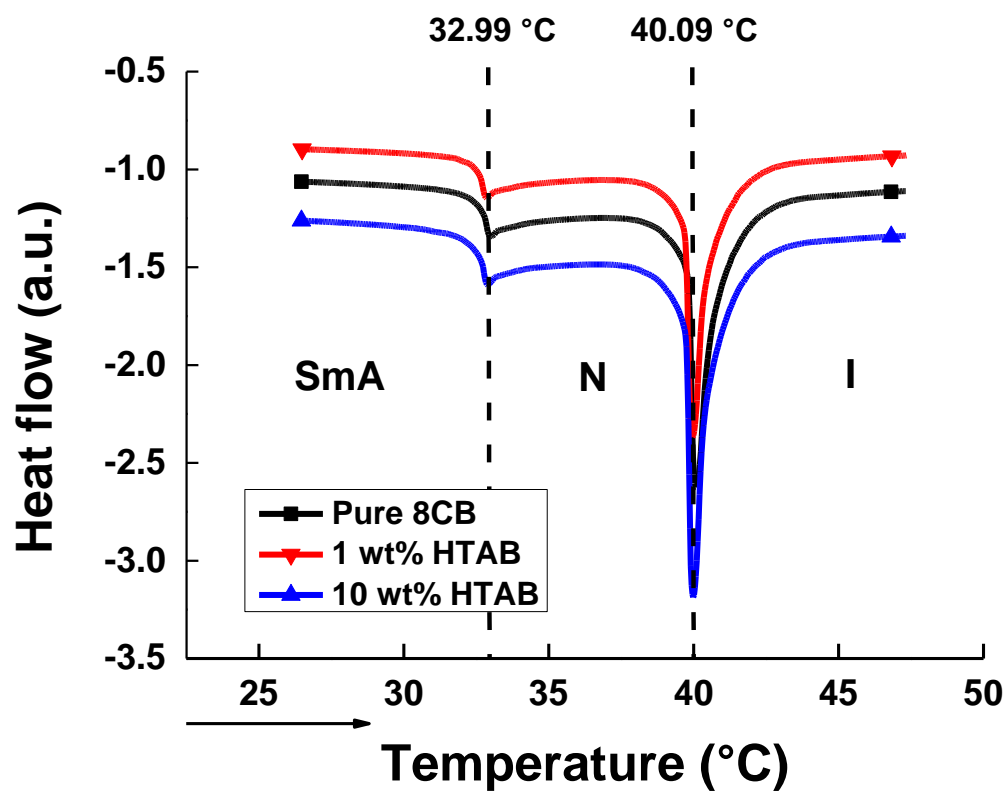

**Fig. S2.** The differential scanning calorimetry (DSC) heat flow results about 8CB+HTAB solutions are indicated over a temperature range from 25 to 47 °C with HTAB concentrations; pure, 1 wt%, and 10 wt%. The heat flow was analyzed by heating the sample.
